# Supplementary material for: Whole-body visualization of SARS-CoV-2 biodistribution in vivo by immunoPET imaging in non-human primates
Source: Springer Nature journal article supplement (doi:10.1038/s41467-025-58173-y), 2025-03-21
Supplement: MOESM1 [file 41467_2025_58173_MOESM1_ESM.pdf]

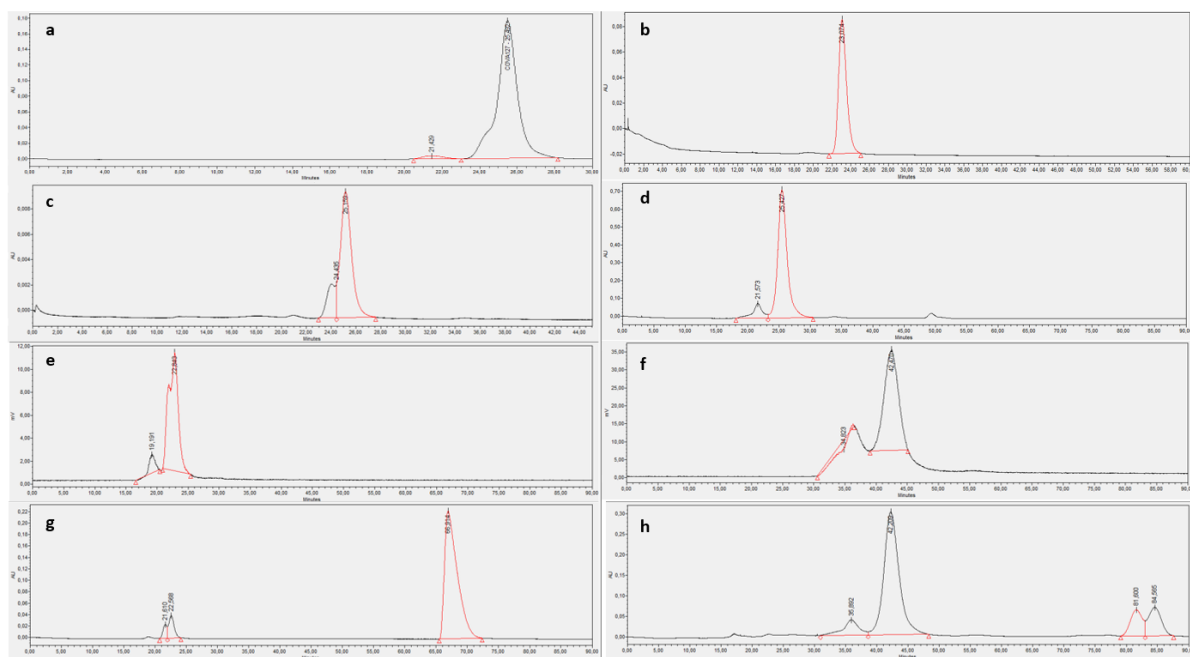

**Supplementary figure 1. Size exclusion chromatography chromatograms**

(a) SEC chromatogram of COVA 1-27;  $rt = 25.5$  min ; (b) SEC chromatogram of IgG1 kappa;  $rt = 23.1$  min ; (c) SEC chromatogram of COVA 1-27-DFO conjugate;  $rt = 24.4, 25.2$  min ; (d) SEC chromatogram of IgG1 kappa;  $rt = 23.1$  min ; (e) SEC chromatogram of radiolabelled COVA 1-27;  $\gamma$  detection,  $rt = 19.2, 22.8$  min ; (f) SEC chromatogram of radiolabelled IgG1 kappa;  $\gamma$  detection,  $rt = 34.8, 42.5$  min ; g SEC chromatogram of radiolabelled COVA 1-27; UV detection,  $rt = 21.6, 22.6$  min ; (h) SEC chromatogram of radiolabelled IgG1 kappa; UV detection,  $rt = 35.9, 42.2$  min

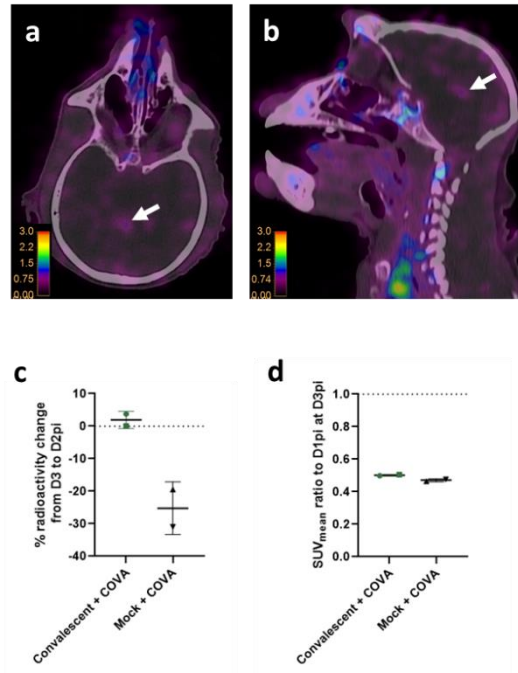

**Supplementary figure 2. COVA1-27 uptake in the brain of convalescent animals**

(a, b)  $[^{89}\text{Zr}]\text{COVA1-27-DFO}$  PET signal in the brain indicated by the white arrows, sagittal and axial view respectively at D3pi. (CM1). (c, d) Corresponding quantification of the maximum (c) and mean (d)  $[^{89}\text{Zr}]\text{COVA1-27-DFO}$  PET signal in the brain of all animals at D3pi with ratio to D2pi and D1pi respectively. Data are represented as individual values with mean and SD (n = 2 animals per group).

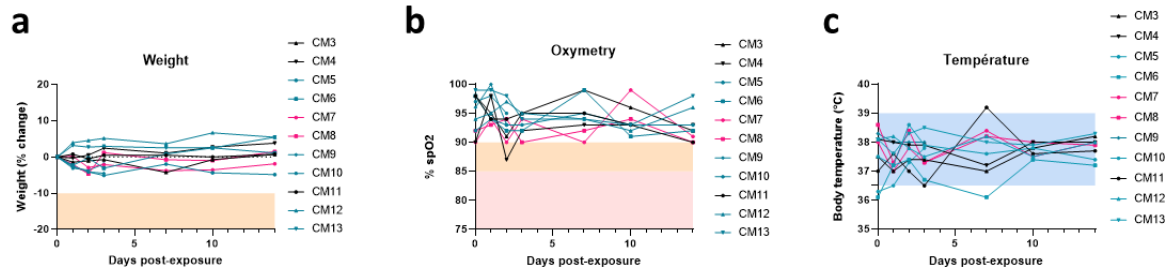

### Supplementary figure 3. Clinical observations

(a) Weight, (b) oxymetry and (c) temperature evolution after exposure, mock+COVA group is represented in black (circle, pyramid, triangle), exposed +COVA group is in turquoise (pyramid, triangle, circle, square, diamond, hexagon) and exposed+IgG in pink (circle, square).

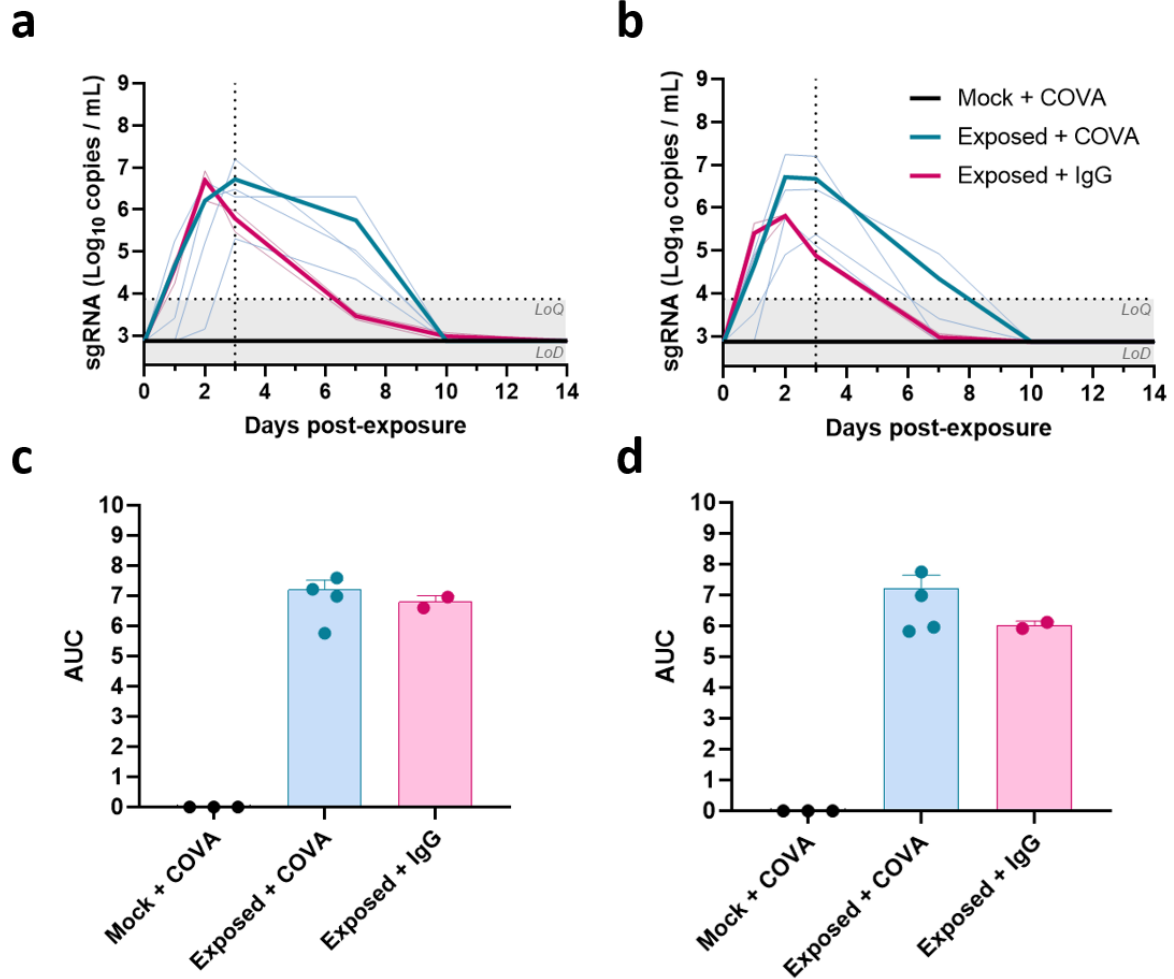

**Supplementary figure 4. SARS-CoV-2 subgenomic RNA (sgRNA) titres over time in nasopharynx and trachea**  
 Evolution of the of the SARS-CoV-2 sgRNA titres (Log<sub>10</sub> copies/mL) over two weeks in the nasopharynx (a) and the trachea ; (b) The individual follow up is represented by the thin lines and the average of each group in bold ; Area under the curve (AUC) for each group in the nasopharynx (c) and the trachea (d) mock+COVA group is represented in black (n = 3 animals), exposed +COVA group is in turquoise (n = 4 animals) and exposed+IgG in pink (n = 2 animals), individual values are represented by circles

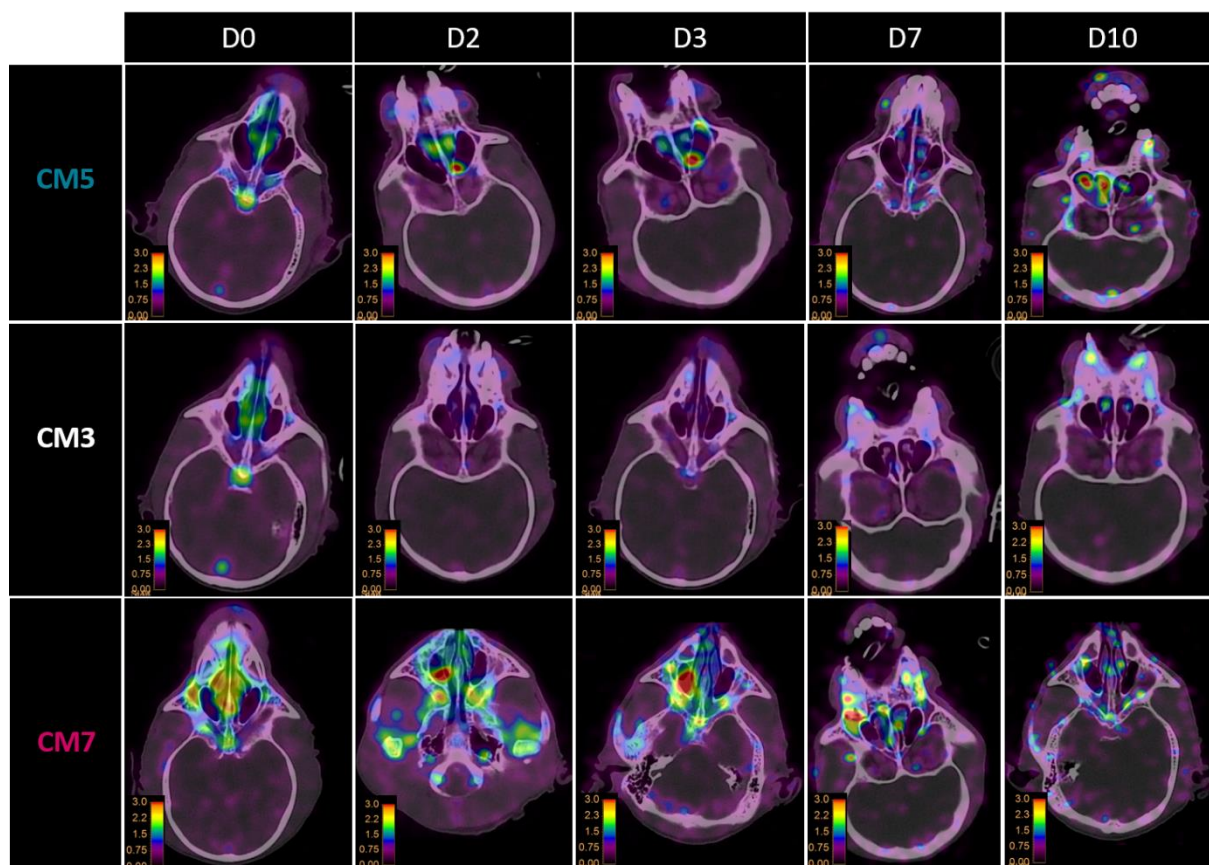

**Supplementary figure 5. COVA1-27 uptake in the nasopharynx**

Representative images of the nasal cavity at day 0, 2, 3, 7, and 10 post-exposure (pe) for each group: CM5 (turquoise, exposed +COVA), CM3 (white, mock+COVA), and CM7 (pink, exposed+IgG), color scale 0-3 SUV.

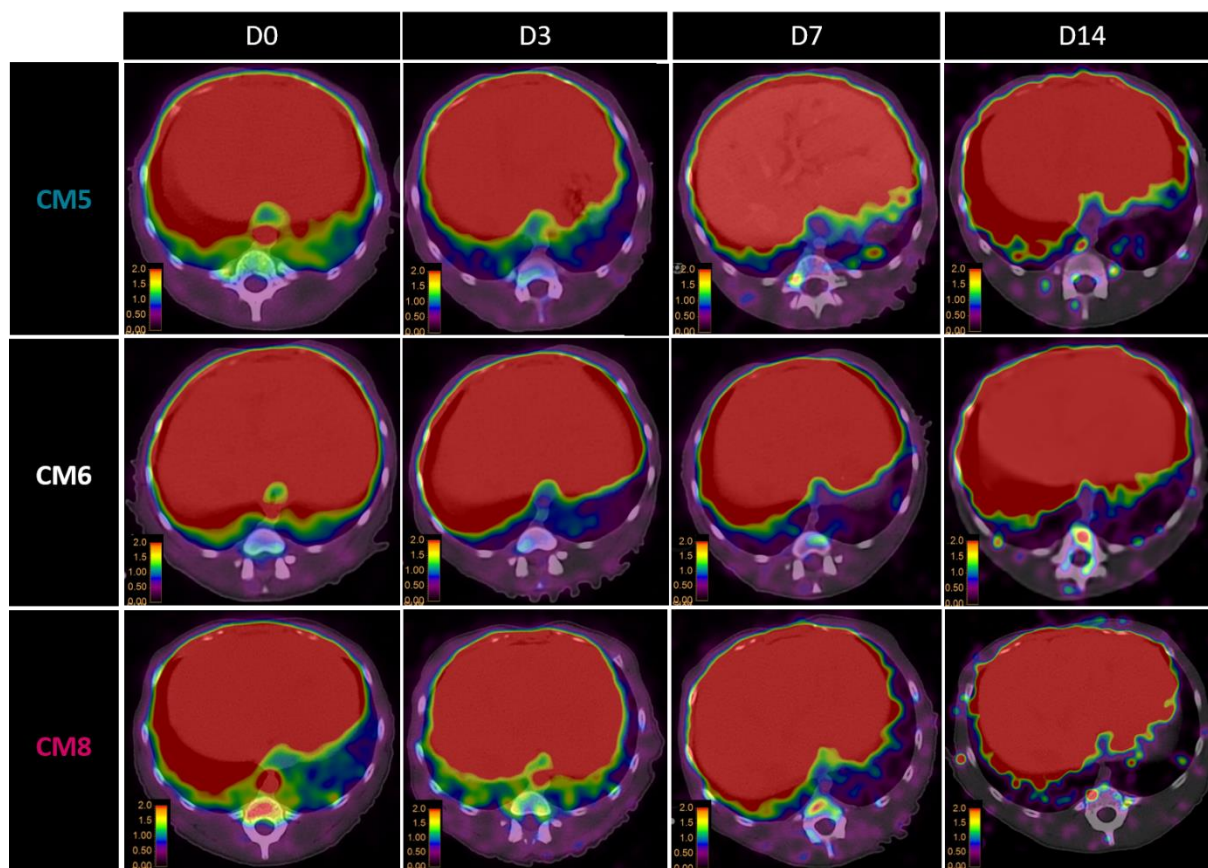

**Supplementary figure 6. COVA1-27 uptake in lungs**

Representative images of the lungs at day 0, 3, 7, and 14 post-exposure (pe) for each group: CM6 (turquoise, exposed +COVA), CM3 (white, mock+COVA), and CM7 (pink, exposed+IgG), color scale 0-2 SUV.

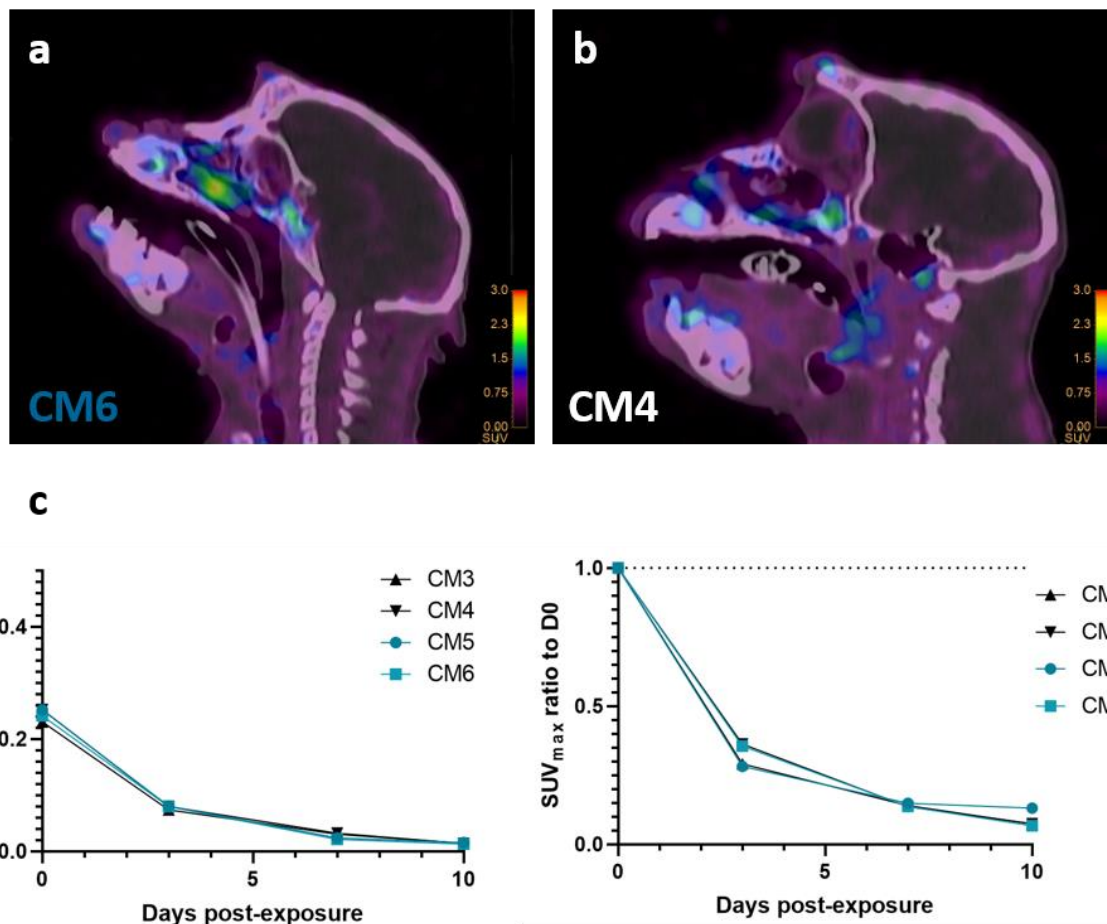

**Supplementary figure 7. COVA1-27 uptake assessment in the brain**

(a-b) Representative images of the brain at day 3 post-exposure (pe) of animals injected with [<sup>89</sup>Zr]COVA1-27-DFO for each group: CM6 (turquoise, exposed +COVA), CM4 (white, mock+COVA), color scale 0-3 SUV. (c-d) Average (SUV<sub>mean</sub>) or maximum (SUV<sub>max</sub>) brain [<sup>89</sup>Zr]COVA1-27-DFO uptake over time in [<sup>89</sup>Zr]COVA1-27-DFO injected animals exposed (turquoise) or not (black) to SARS-CoV-2



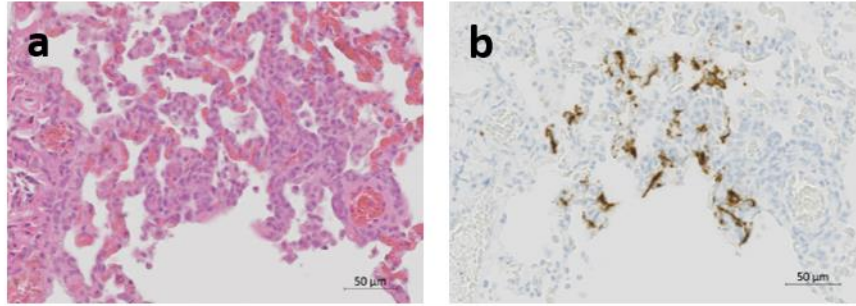

**Supplementary figure 8. Representative viral distribution in the lung parenchyma of CM10**

(a) Histological characterisation using Hematoxylin Eosin (HE) staining in the caudal right lobe of the lungs of CM10 and corresponding (b) cellular-scale evaluation of the virus distribution (brown signal) using in situ hybridisation (ISH) in the lungs (caudal left lobe)



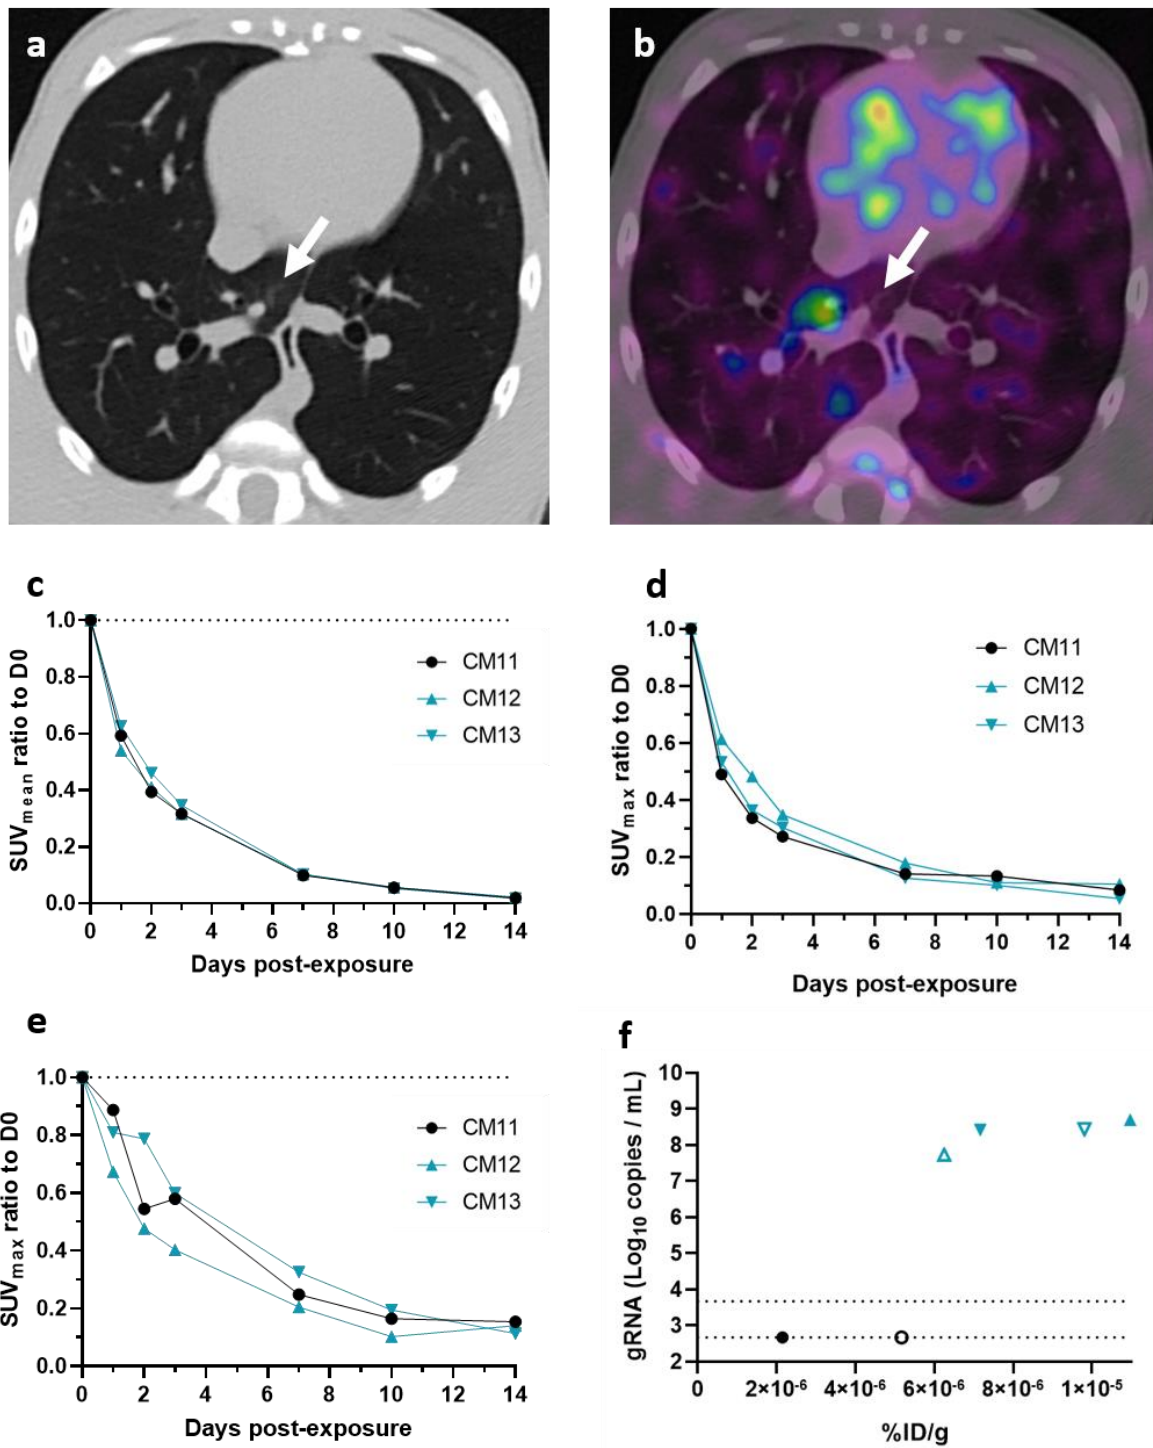

**Supplementary figure 9. Low dose COVA1-27 uptake assessment in lungs and nasal cavity**

(a) Representative CT lung lesion indicated by the white arrow and (b) its associated PET signal indicated by a white arrow, color scale 0-3 SUV ; (c) Longitudinal evaluation of the normalized PET signal  $SUV_{mean}$  and (d)  $SUV_{max}$  to D0 post-exposure (0 dpe) in the lungs of animals ; (e) Longitudinal evaluation of the normalized PET signal  $SUV_{max}$  to 0 dpe in the nasal cavity of animals ; (f) Evolution from 2 (hollow symbol) to 3 dpe (filled symbol) of the radioactivity in the nasopharyngeal swabs correlated with the SARS-CoV-2 gRNA titres in the same sample

| Organ samples list          | Included in the analysis |
|-----------------------------|--------------------------|
| Lung – cranial right lobe   | x                        |
| Lung – cranial left lobe    | x                        |
| Lung – caudal right lobe    | x                        |
| Lung – caudal left lobe     | x                        |
| Lung –right lingula lobe    | x                        |
| Lung –left lingula lobe     | x                        |
| Lung – accessory lobe       | x                        |
| Trachea                     | x                        |
| Spleen                      | x                        |
| Axillary lymph node         | x                        |
| Inguinal lymph node         | x                        |
| Tracheobronchial lymph node | x                        |
| Heart                       | x                        |
| Kidney -Right               | x                        |
| Kidney -Left                | x                        |
| Liver                       |                          |

**Supplementary table 1. Organ sampling at necropsy**

| Animal ID | Probe    | Tracer dose | Exposition                         | Group                     | Follow up time | Nasal rhinorea (Y/N) | Nasal SUVmax ratio at D3 | Nasal swab radioactivity at D3 (%ID/g) | Nasal swab RNA titers at D3 (RNA copies/mL) |
|-----------|----------|-------------|------------------------------------|---------------------------|----------------|----------------------|--------------------------|----------------------------------------|---------------------------------------------|
| CM1       | COVA1-27 | 2,5mg       | Convalescents SARS-CoV-2 (3months) | Convalescent + COVA       | 1 week         | No                   | 0,44                     | 5,42E-06                               | 0,00E+00                                    |
| CM2       | COVA1-27 | 2,5mg       | Convalescents SARS-CoV-2 (3months) | Convalescent + COVA       | 1 week         | No                   | 0,41                     | 4,62E-05                               | 0,00E+00                                    |
| CM3       | COVA1-27 | 2,5mg       | PBS                                | Mock + COVA               | 2 weeks        | No                   | 0,45                     | 3,15E-06                               | 0,00E+00                                    |
| CM4       | COVA1-27 | 2,5mg       | PBS                                | Mock + COVA               | 2 weeks        | No                   | 0,49                     | 1,97E-06                               | 0,00E+00                                    |
| CM5       | COVA1-27 | 2,5mg       | SARS-CoV-2 (B.1.617.2)             | Exposed + COVA            | 2 weeks        | Yes                  | 1,00                     | 8,14E-06                               | 2,15E+07                                    |
| CM6       | COVA1-27 | 2,5mg       | SARS-CoV-2 (B.1.617.2)             | Exposed + COVA            | 2 weeks        | No                   | 0,51                     | 8,95E-06                               | 2,74E+08                                    |
| CM7       | IgG1     | 2,5mg       | SARS-CoV-2 (B.1.617.2)             | Exposed + IgG             | 2 weeks        | Yes                  | 0,63                     | 2,23E-06                               | 1,11E+08                                    |
| CM8       | IgG1     | 2,5mg       | SARS-CoV-2 (B.1.617.2)             | Exposed + IgG             | 2 weeks        | No                   | 0,46                     | 4,01E-06                               | 1,52E+08                                    |
| CM9       | COVA1-27 | 2,5mg       | SARS-CoV-2 (B.1.617.2)             | Exposed + COVA (eutha D3) | 3 days         | No                   | 0,47                     | 1,91E-05                               | / (sampling issue)                          |
| CM10      | COVA1-27 | 2,5mg       | SARS-CoV-2 (B.1.617.2)             | Exposed + COVA (eutha D3) | 3 days         | No                   | 0,58                     | 1,08E-05                               | 3,45E+07                                    |
| CM11      | COVA1-27 | 150µg       | PBS                                | Mock + COVA (low dose)    | 2 weeks        | No                   | 0,58                     | 2,15E-06                               | 0,00E+00                                    |
| CM12      | COVA1-27 | 150µg       | SARS-CoV-2 (B.1.617.2)             | Exposed + COVA (low dose) | 2 weeks        | No                   | 0,40                     | 1,10E-05                               | 5,09E+08                                    |
| CM13      | COVA1-27 | 150µg       | SARS-CoV-2 (B.1.617.2)             | Exposed + COVA (low dose) | 2 weeks        | No                   | 0,60                     | 7,17E-06                               | 2,64E+08                                    |

| Animal ID | Probe    | Tracer dose | Exposition                         | Group                     | Follow up time | Lung lesions (Y/N) | Type of lung lesions (number) | Lung lesion ROI SUVmax ratio at D7 | Brain SUVmax ratio at D3 |
|-----------|----------|-------------|------------------------------------|---------------------------|----------------|--------------------|-------------------------------|------------------------------------|--------------------------|
| CM1       | COVA1-27 | 2,5mg       | Convalescents SARS-CoV-2 (3months) | Convalescent + COVA       | 1 week         | No                 | /                             | /                                  | 0,80                     |
| CM2       | COVA1-27 | 2,5mg       | Convalescents SARS-CoV-2 (3months) | Convalescent + COVA       | 1 week         | Yes                | GGO (n=1)                     | 0,28                               | 0,64                     |
| CM3       | COVA1-27 | 2,5mg       | PBS                                | Mock + COVA               | 2 weeks        | No                 | /                             | /                                  | 0,43                     |
| CM4       | COVA1-27 | 2,5mg       | PBS                                | Mock + COVA               | 2 weeks        | No                 | /                             | /                                  | 0,48                     |
| CM5       | COVA1-27 | 2,5mg       | SARS-CoV-2 (B.1.617.2)             | Exposed + COVA            | 2 weeks        | Yes                | GGO (n=3)                     | 0,22                               | 0,50                     |
| CM6       | COVA1-27 | 2,5mg       | SARS-CoV-2 (B.1.617.2)             | Exposed + COVA            | 2 weeks        | Yes                | GGO (n=2)                     | 0,34                               | 0,47                     |
| CM7       | IgG1     | 2,5mg       | SARS-CoV-2 (B.1.617.2)             | Exposed + IgG             | 2 weeks        | Yes                | GGO (n=3)                     | 0,22                               | not assessed             |
| CM8       | IgG1     | 2,5mg       | SARS-CoV-2 (B.1.617.2)             | Exposed + IgG             | 2 weeks        | Yes                | GGO (n=1)                     | 0,17                               | not assessed             |
| CM9       | COVA1-27 | 2,5mg       | SARS-CoV-2 (B.1.617.2)             | Exposed + COVA (eutha D3) | 3 days         | Yes                | GGO (n=1)                     | not assessed (eutha D3)            | 0,46                     |
| CM10      | COVA1-27 | 2,5mg       | SARS-CoV-2 (B.1.617.2)             | Exposed + COVA (eutha D3) | 3 days         | Yes                | GGO (n=2)                     | not assessed (eutha D3)            | 0,40                     |
| CM11      | COVA1-27 | 150µg       | PBS                                | Mock + COVA (low dose)    | 2 weeks        | No                 | /                             | /                                  | not assessed             |
| CM12      | COVA1-27 | 150µg       | SARS-CoV-2 (B.1.617.2)             | Exposed + COVA (low dose) | 2 weeks        | Yes                | GGO (n=3)                     | 0,18                               | not assessed             |
| CM13      | COVA1-27 | 150µg       | SARS-CoV-2 (B.1.617.2)             | Exposed + COVA (low dose) | 2 weeks        | Yes                | GGO (n=2)                     | 0,13                               | not assessed             |

Supplementary table 2. Individual data summary
